# Supplementary material for: Phenolic Profile, Antioxidant and Enzyme Inhibitory Activities of Leaves from Two Cassia and Two Senna Species
Source: MDPI journal article supplement (doi:10.3390/molecules27175590), 2022-08-30
Supplement: s1 [file s1]

supplementary material

# Phenolic Profile and Antioxidant and Enzyme Inhibitory Activities of Leaves from Two *Cassia* and Two *Senna* Species

Haifa A. A. Omer <sup>1,2</sup>, Giovanni Caprioli <sup>3</sup>, Doaa Abouelenein <sup>3</sup>, Ahmed M. Mustafa <sup>3</sup>, Abdullahi Ibrahim Uba <sup>4</sup>, Gunes Ak <sup>5</sup>, Refiye Beyza Ozturk <sup>5</sup>, Gokhan Zengin <sup>5</sup> and Sakina Yagi <sup>2,\*</sup>

## *Assays for Total Phenolic and Flavonoid Contents*

The total phenolic content was determined by employing the methods given in the literature with some modification. A sample solution (2 mg/ml, 0.25 mL) was mixed with diluted Folin–Ciocâlteu reagent (1 mL, 1:9, v/v) and shaken vigorously. After 3 min, a Na<sub>2</sub>CO<sub>3</sub> solution (0.75 mL, 1%) was added and the sample absorbance was read at 760 nm after a 2 h incubation at room temperature. The total phenolic content was expressed as milligrams of gallic acid equivalents (mg GAE/g extract)(Uysal et al., 2017).

The total flavonoid content was determined using the AlCl<sub>3</sub> method. Briefly, a sample solution (2 mg/ml, 1 mL) was mixed with the same volume of aluminum trichloride (2%) in methanol. Similarly, a blank was prepared by adding a sample solution (1 mL) to methanol (1 mL) without AlCl<sub>3</sub>. The sample and blank absorbances were read at 415 nm after a 10 min incubation at room temperature. The absorbance of the blank was subtracted from that of the sample. Rutin was used as a reference standard and the total flavonoid content was expressed as milligrams of rutin equivalents (mg RE/g extract) (Uysal et al., 2017).

## *Determination of Antioxidant and Enzyme Inhibitory Effects*

Antioxidant (DPPH and ABTS radical scavenging, reducing power (CUPRAC and FRAP), phosphomolybdenum and metal chelating (ferrozine method)), and enzyme

inhibitory activities (cholinesterase (Eldmann's method), tyrosinase (dopachrome method),  $\alpha$ -amylase (iodine/potassium iodide method),  $\alpha$ -glucosidase (chromogenic PNPG method) and pancreatic lipase (*p*-nitrophenyl butyrate (*p*-NPB) method)) were determined using the methods previously described by Uysal et al. (Uysal et al., 2017) and Grochowski et al. (Grochowski et al., 2017)

For the DPPH (1,1-diphenyl-2-picrylhydrazyl) radical scavenging assay: A sample solution (0.2–2 mg/ml) was added to 4 mL of a 0.004% methanol solution of DPPH. The sample absorbance was read at 517 nm after a 30 min incubation at room temperature in the dark. DPPH radical scavenging activity was expressed as milligrams of Trolox equivalents (mg TE/g extract).

For the ABTS (2,2'-azino-bis(3-ethylbenzothiazoline) 6-sulfonic acid) radical scavenging assay: Briefly, ABTS<sup>+</sup> was produced directly by reacting 7 mM ABTS solution with 2.45 mM potassium persulfate and allowing the mixture to stand for 12–16 min in the dark at room temperature. Prior to beginning the assay, the ABTS solution was diluted with methanol to an absorbance of  $0.700 \pm 0.02$  at 734 nm. A sample solution (0.2–2 mg/ml) was added to the ABTS solution (2 mL) and mixed. The sample absorbance was read at 734 nm after a 30 min incubation at room temperature. The ABTS radical scavenging activity was expressed as milligrams of Trolox equivalents (mg TE/g extract).

For the CUPRAC (cupric ion reducing activity) activity assay: A sample solution (0.2–2 mg/ml) was added to a premixed reaction mixture containing CuCl<sub>2</sub> (1 mL, 10 mM), neocuproine (1 mL, 7.5 mM) and a NH<sub>4</sub>Ac buffer (1 mL, 1 M, pH 7.0). Similarly, a blank was prepared by adding a sample solution (0.5 mL) to a premixed reaction mixture (3 mL)

without  $\text{CuCl}_2$ . Then, the sample and blank absorbances were read at 450 nm after a 30 min incubation at room temperature. The absorbance of the blank was subtracted from that of the sample. The CUPRAC activity was expressed as milligrams of Trolox equivalents (mg TE/g extract).

For the FRAP (ferric reducing antioxidant power) activity assay: A sample solution (0.2–2 mg/ml) was added to a premixed FRAP reagent (2 mL) containing acetate buffer (0.3 M, pH 3.6), 2,4,6-tris(2-pyridyl)-S-triazine (TPTZ) (10 mM) in 40 mM HCl, and ferric chloride (20 mM) in a ratio of 10:1:1 (v/v/v). Then, the sample absorbance was read at 593 nm after a 30 min incubation at room temperature. The FRAP activity was expressed as milligrams of Trolox equivalents (mg TE/g extract).

For the phosphomolybdenum method: A sample solution (0.2–2 mg/ml) was combined with 3 mL of reagent solution (0.6 M sulfuric acid, 28 mM sodium phosphate, and 4 mM ammonium molybdate). The sample absorbance was read at 695 nm after a 90 min incubation at 95 °C. The total antioxidant capacity was expressed as millimoles of Trolox equivalents (mmol TE/g extract).

For the metal chelating activity assay: Briefly, a sample solution (0.2–2 mg/ml) was added to the  $\text{FeCl}_2$  solution (0.05 mL, 2 mM). The reaction was initiated by the addition of 5 mM ferrozine (0.2 mL). Similarly, a blank was prepared by adding a sample solution (2 mL) to the  $\text{FeCl}_2$  solution (0.05 mL, 2 mM) and water (0.2 mL) without ferrozine. Then, the sample and blank absorbances were read at 562 nm after 10 min incubation at room temperature. The absorbance of the blank was subtracted from that of the sample. The metal

chelating activity was expressed as milligrams of EDTA (disodium edetate) equivalents (mg EDTAE/g extract).

For the Cholinesterase (ChE) inhibitory activity assay: A sample solution (0.2–2 mg/ml) was mixed with DTNB (5,5-dithio-bis(2-nitrobenzoic) acid, Sigma, St. Louis, MO, U.S.A.) (125  $\mu$ L) and AChE (acetylcholinesterase (Electric ell acetylcholinesterase, Type-VI-S, EC 3.1.1.7, Sigma)), or BChE (butyrylcholinesterase (horse serum butyrylcholinesterase, EC 3.1.1.8, Sigma)) solution (25  $\mu$ L) in Tris–HCl buffer (pH 8.0) in a 96-well microplate and incubated for 15 min at 25 °C. The reaction was then initiated with the addition of acetylthiocholine iodide (ATCI, Sigma) or butyrylthiocholine chloride (BTCL, Sigma) (25  $\mu$ L). Similarly, a blank was prepared by adding a sample solution to all reaction reagents without the enzyme (AChE or BChE) solution. The sample and blank absorbances were read at 405 nm after 10 min incubation at 25 °C. The absorbance of the blank was subtracted from that of the sample and the cholinesterase inhibitory activity was expressed as galanthamine equivalents (mgGALAE/g extract).

For the Tyrosinase inhibitory activity assay: A sample solution (0.2–2 mg/ml) was mixed with tyrosinase solution (40  $\mu$ L, Sigma) and phosphate buffer (100  $\mu$ L, pH 6.8) in a 96-well microplate and incubated for 15 min at 25 °C. The reaction was then initiated with the addition of L-DOPA (40  $\mu$ L, Sigma). Similarly, a blank was prepared by adding a sample solution to all reaction reagents without the enzyme (tyrosinase) solution. The sample and blank absorbances were read at 492 nm after a 10 min incubation at 25 °C. The absorbance of the blank was subtracted from that of the sample and the tyrosinase inhibitory activity was expressed as kojic acid equivalents (mgKAE/g extract).

For the  $\alpha$ -amylase inhibitory activity assay: A sample solution (0.2–2 mg/ml) was mixed with an  $\alpha$ -amylase solution (ex-porcine pancreas, EC 3.2.1.1, Sigma) (50  $\mu$ L) in a phosphate buffer (pH 6.9 with 6 mM sodium chloride) in a 96-well microplate and incubated for 10 min at 37 °C. After pre-incubation, the reaction was initiated with the addition of a starch solution (50  $\mu$ L, 0.05%). Similarly, a blank was prepared by adding a sample solution to all reaction reagents without the enzyme ( $\alpha$ -amylase) solution. The reaction mixture was incubated for 10 min at 37 °C. The reaction was then stopped with the addition of HCl (25  $\mu$ L, 1 M). This was followed by the addition of the iodine-potassium iodide solution (100  $\mu$ L). The sample and blank absorbances were read at 630 nm. The absorbance of the blank was subtracted from that of the sample and the  $\alpha$ -amylase inhibitory activity was expressed as acarbose equivalents (mmol ACE/g extract).

For the  $\alpha$ -glucosidase inhibitory activity assay: A sample solution (0.2–2 mg/ml) was mixed with the glutathione (50  $\mu$ L),  $\alpha$ -glucosidase solution (from *Saccharomyces cerevisiae*, EC 3.2.1.20, Sigma) (50  $\mu$ L) in a phosphate buffer (pH 6.8) and PNPG (4-N-trophenyl- $\alpha$ -D-glucopyranoside, Sigma) (50  $\mu$ L) in a 96-well microplate and incubated for 15 min at 37 °C. Similarly, a blank was prepared by adding a sample solution to all reaction reagents without the enzyme ( $\alpha$ -glucosidase) solution. The reaction was then stopped with the addition of sodium carbonate (50  $\mu$ L, 0.2 M). The sample and blank absorbances were read at 400 nm. The absorbance of the blank was subtracted from that of the sample and the  $\alpha$ -glucosidase inhibitory activity was expressed as acarbose equivalents (mmol ACE/g extract).

**Table S1.** HPLC–MS/MS acquisition parameters (dynamic MRM mode) used for the analysis of the 38 marker compounds.

| No. | Compounds                     | Precursor ion, <i>m/z</i> | Product ion, <i>m/z</i> | Fragm-entor, V | Collision energy, V | Polarity | Retention time (Rt, min) |
|-----|-------------------------------|---------------------------|-------------------------|----------------|---------------------|----------|--------------------------|
| 1   | Gallic acid                   | 169                       | 125.2*                  | 97             | 12                  | Negative | 6.96                     |
| 2   | Neochlorogenic acid           | 353                       | 191.2*, 179             | 82             | 12, 12              | Negative | 9.52                     |
| 3   | Delphinidin-3-galactoside     | 465.01                    | 303*                    | 121            | 20                  | Positive | 11.36                    |
| 4   | (+)-Catechin                  | 289                       | 245.2*, 109.2           | 131            | 8, 20               | Negative | 11.44                    |
| 5   | Procyanidin B2                | 576.99                    | 576.99*, 321.2          | 160            | 0, 32               | Negative | 12.41                    |
| 6   | Chlorogenic acid              | 353                       | 191.2*, 127.5           | 82             | 12, 20              | Negative | 12.42                    |
| 7   | <i>p</i> -Hydroxybenzoic acid | 137                       | 93.2*                   | 92             | 16                  | Negative | 12.86                    |
| 8   | (-)-Epicatechin               | 289                       | 245.1*, 109.1           | 126            | 8, 20               | Negative | 13.03                    |
| 9   | Cyanidin-3-glucoside          | 449                       | 287.3*, 255.6           | 121            | 20, 20              | Positive | 13.14                    |
| 10  | Petunidin-3-glucoside         | 479.01                    | 317*, 302               | 121            | 20, 44              | Positive | 13.26                    |
| 11  | 3-Hydroxybenzoic acid         | 137                       | 93.2*                   | 88             | 8                   | Negative | 13.59                    |
| 12  | Caffeic acid                  | 179                       | 135.2*, 134.1           | 92             | 12, 24              | Negative | 13.65                    |
| 13  | Vanillic acid                 | 167                       | 152.4*, 108.1           | 88             | 12, 20              | Negative | 14.32                    |
| 14  | Resveratrol                   | 227                       | 185*, 143.2             | 136            | 12, 20              | Negative | 14.40                    |
| 15  | Pelargonidin-3-glucoside      | 433.01                    | 271*, 121               | 116            | 24, 50              | Positive | 14.52                    |
| 16  | Pelargonidin-3-rutinoside     | 579.01                    | 271*                    | 145            | 32                  | Positive | 14.56                    |
| 17  | Malvidin-3-galactoside        | 493.01                    | 331*, 315.1             | 121            | 20, 50              | Positive | 14.64                    |
| 18  | Syringic acid                 | 196.9                     | 182.2*, 121.2           | 93             | 8, 12               | Negative | 15.28                    |
| 19  | Procyanidin A2                | 575                       | 575*, 285               | 170            | 0, 20               | Negative | 16.18                    |
| 20  | <i>p</i> -Coumaric acid       | 163                       | 119.2*, 93.2            | 83             | 12, 36              | Negative | 16.70                    |
| 21  | Ferulic acid                  | 193                       | 134.2*, 131.6           | 83             | 12, 8               | Negative | 17.10                    |
| 22  | 3,5-Dicaffeoylquinic acid     | 514.9                     | 353.1*, 191             | 117            | 8, 28               | Negative | 17.61                    |
| 23  | Rutin                         | 609                       | 300.2*, 271.2           | 170            | 32, 50              | Negative | 17.73                    |
| 24  | Hyperoside                    | 465.01                    | 303*, 61.1              | 97             | 8, 50               | Positive | 18.33                    |
| 25  | Isoquercitrin                 | 463                       | 271.2*, 300.2           | 155            | 44, 24              | Negative | 18.36                    |
| 26  | Delphinidin-3,5-diglucoside   | 462.9                     | 300.1*                  | 165            | 24                  | Negative | 18.38                    |
| 27  | Phloridzin                    | 435.39                    | 273*, 167               | 155            | 8, 28               | Negative | 18.83                    |
| 28  | Quercitrin                    | 446.99                    | 300.2*, 301.2           | 160            | 24, 16              | Negative | 19.61                    |
| 29  | Myricetin                     | 316.99                    | 179.1*, 182             | 150            | 16, 24              | Negative | 19.61                    |
| 30  | Naringin                      | 578.99                    | 271.3*, 151.3           | 170            | 32, 44              | Negative | 19.62                    |
| 31  | Kaempferol-3-glucoside        | 447                       | 284.2*, 255.2           | 170            | 24, 40              | Negative | 19.77                    |
| 32  | Hesperidin                    | 611.01                    | 303*, 334.8             | 112            | 20, 12              | Positive | 20.19                    |
| 33  | Ellagic acid                  | 301                       | 301*, 229               | 170            | 0, 24               | Negative | 21.41                    |
| 34  | <i>Trans</i> -Cinnamic acid   | 149                       | 131.2*, 77.2            | 74             | 4, 36               | Positive | 21.44                    |
| 35  | Quercetin                     | 300.99                    | 151.2*, 179.2           | 145            | 16, 12              | Negative | 21.87                    |
| 36  | Phloretin                     | 272.99                    | 167*, 123               | 116            | 8, 20               | Negative | 22.30                    |
| 37  | Kaempferol                    | 287.01                    | 153*, 69.1              | 60             | 36, 50              | Positive | 23.84                    |
| 38  | Isorhamnetin                  | 314.99                    | 300.2*, 196.1           | 145            | 16, 4               | Negative | 24.57                    |

\* These product ions were used for quantification.

## References

- Grochowski, D. M., Uysal, S., Aktumsek, A., Granica, S., Zengin, G., Ceylan, R., . . . Tomczyk, M. (2017). In vitro enzyme inhibitory properties, antioxidant activities, and phytochemical profile of *Potentilla thuringiaca*. *Phytochemistry Letters*, 20, 365–372.
- Uysal, S., Zengin, G., Locatelli, M., Bahadori, M. B., Mocan, A., Bellagamba, G., . . . Aktumsek, A. (2017). Cytotoxic and enzyme inhibitory potential of two *Potentilla* species (*P. speciosa* L. and *P. reptans* Willd.) and their chemical composition. *Frontiers in pharmacology*, 8, 290.
